# Supplementary material for: Scalability of carbon-nanotube-based thin film transistors for flexible electronic devices manufactured using an all roll-to-roll gravure printing system
Source: PubMed Central journal article supplement (PMC4585984; doi:10.1038/srep14459), 2015-09-28
Supplement: srep14459-s1.pdf [file srep14459-s1.pdf]

# Scalability of carbon-nanotube-based thin film transistor for a flexible electronic device through an all roll-to-roll gravure printing system

Hyunmo Koo<sup>1</sup>, Wookyu Lee<sup>2</sup>, Yunchang Choi<sup>1</sup>, Junfeng Sun<sup>1</sup>, Jina Bak<sup>2</sup>, Jinsoo Noh<sup>1</sup>, Vivek Subramanian<sup>3</sup>, Yasuo Azuma<sup>4</sup>, Yutaka Majima<sup>4</sup>, and Gyoujin Cho<sup>1,2\*</sup>

<sup>1</sup>Department of Printed Electronics Engineering, Suncheon National University, Suncheon 540-742, Korea

<sup>2</sup>Regional Innovation Center for Printed Electronics, Suncheon National University, Suncheon 540-742, Korea

<sup>3</sup>Department of Electrical Engineering and Computer Sciences, University of California, Berkeley CA 9472033, USA

<sup>4</sup>Materials and Structure Laboratory, Tokyo Institute of Technology, Yokohama 226-8503, Japan

## Supplementary Information

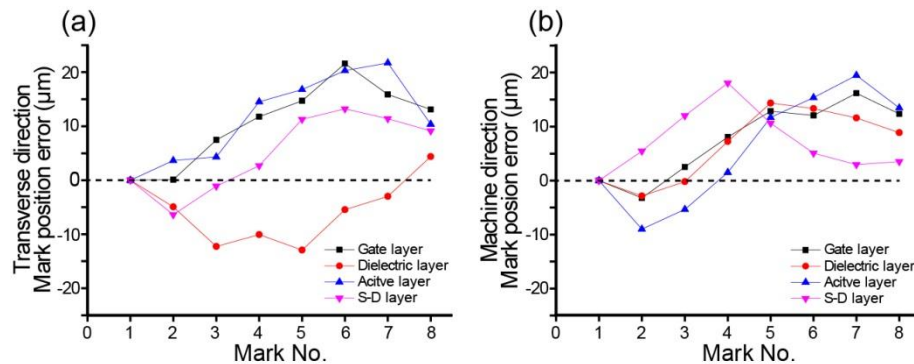

**Figure S1.** Registration markers on a gravure cylinder roll show a mismatch within the range of  $\pm 20$   $\mu\text{m}$ .

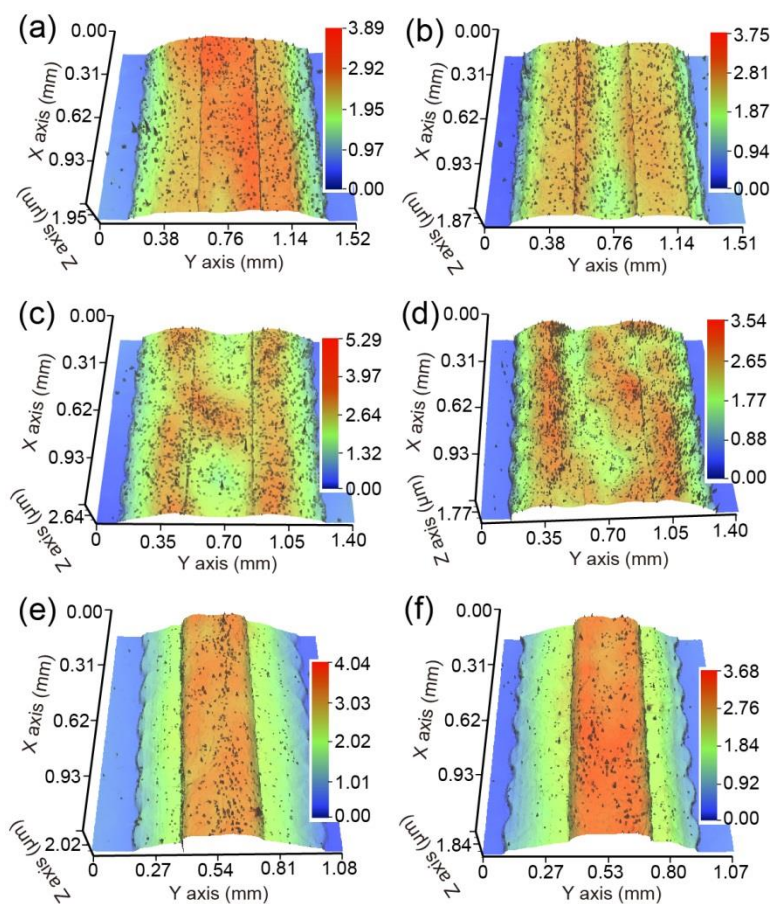

**Figure S2.** Morphology of R2R gravure-printed dielectric layer with line widths of 1.1 mm (a)–(d) and 0.8 mm (e)–(f), using various viscosities of the dielectric ink: (a) 125, (b) 160, (c) 200, (d) 250, (e) 100, and (f) 120 cP.

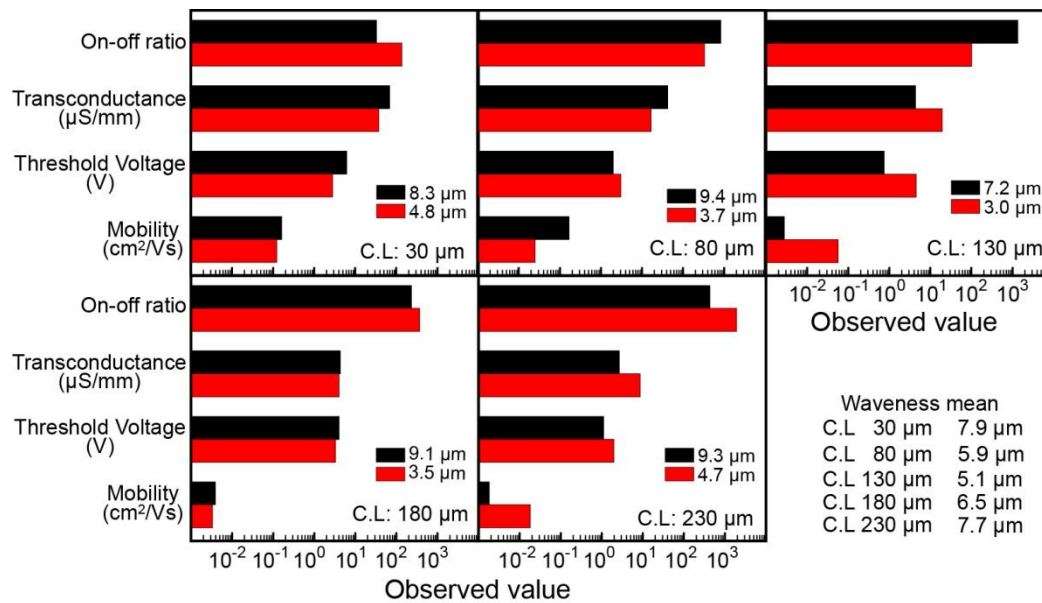

**Figure S3.** Variations in key electrical characteristics from two extreme samples of source-drain edge waviness of printed SWNT-TFTs with channel lengths of 30, 80, 130, 180, and 230 μm.

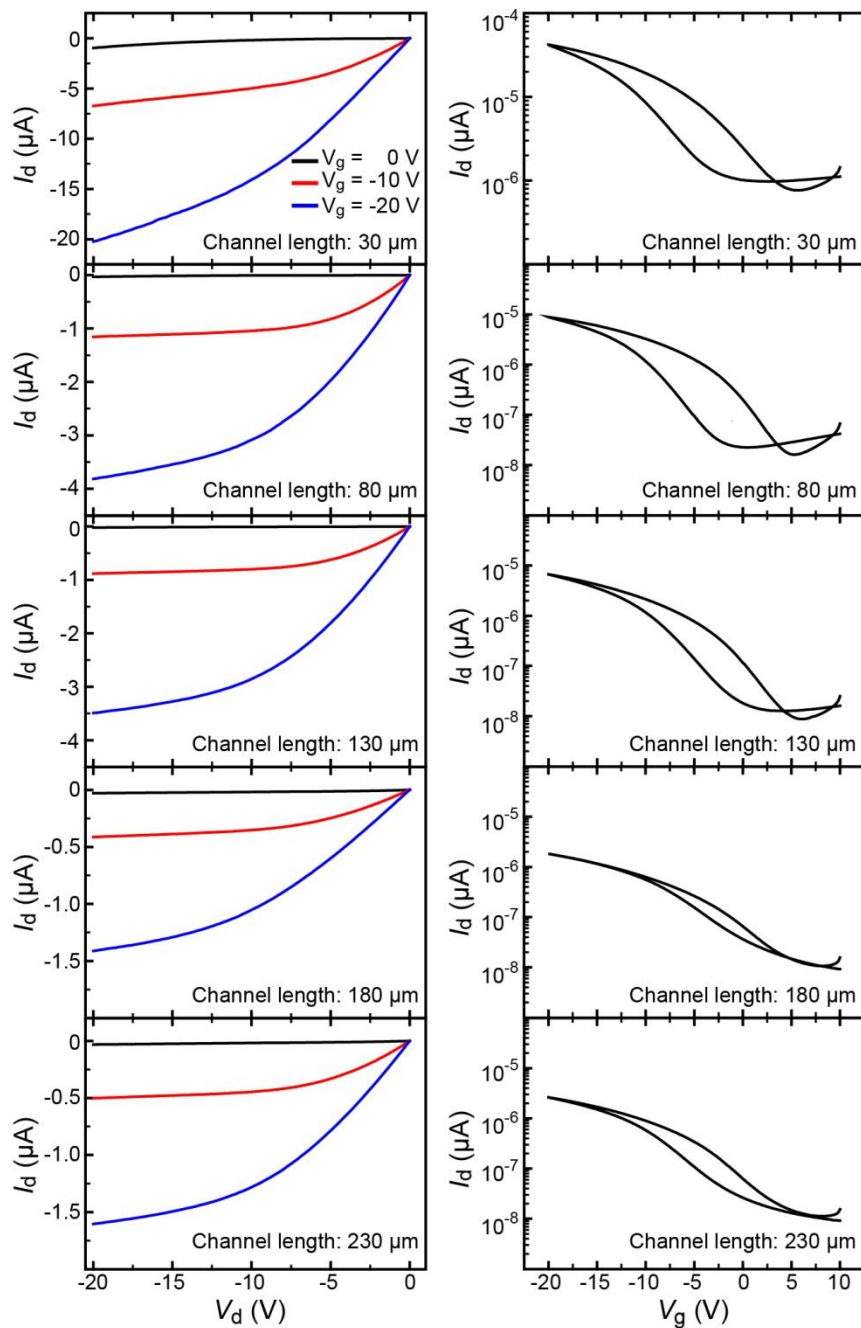

**Figure S4.** Typical output and transfer characteristics of printed SWNT-TFTs with channel lengths of 30, 80, 130, 180, and 230  $\mu\text{m}$ .

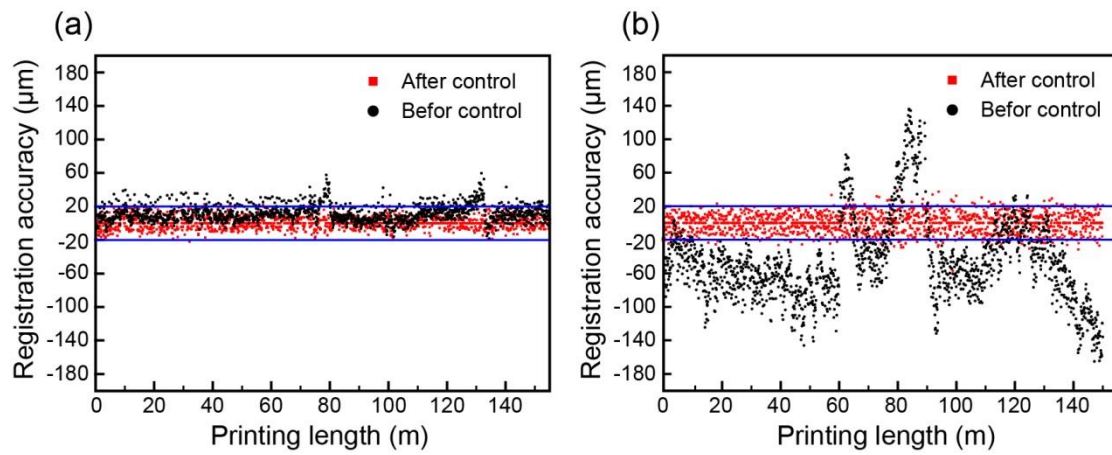

**Figure S5.** Attained values of registration accuracy of R2R gravure with machine (a) and transverse (b) directions at the printing speed of 8 m/min.

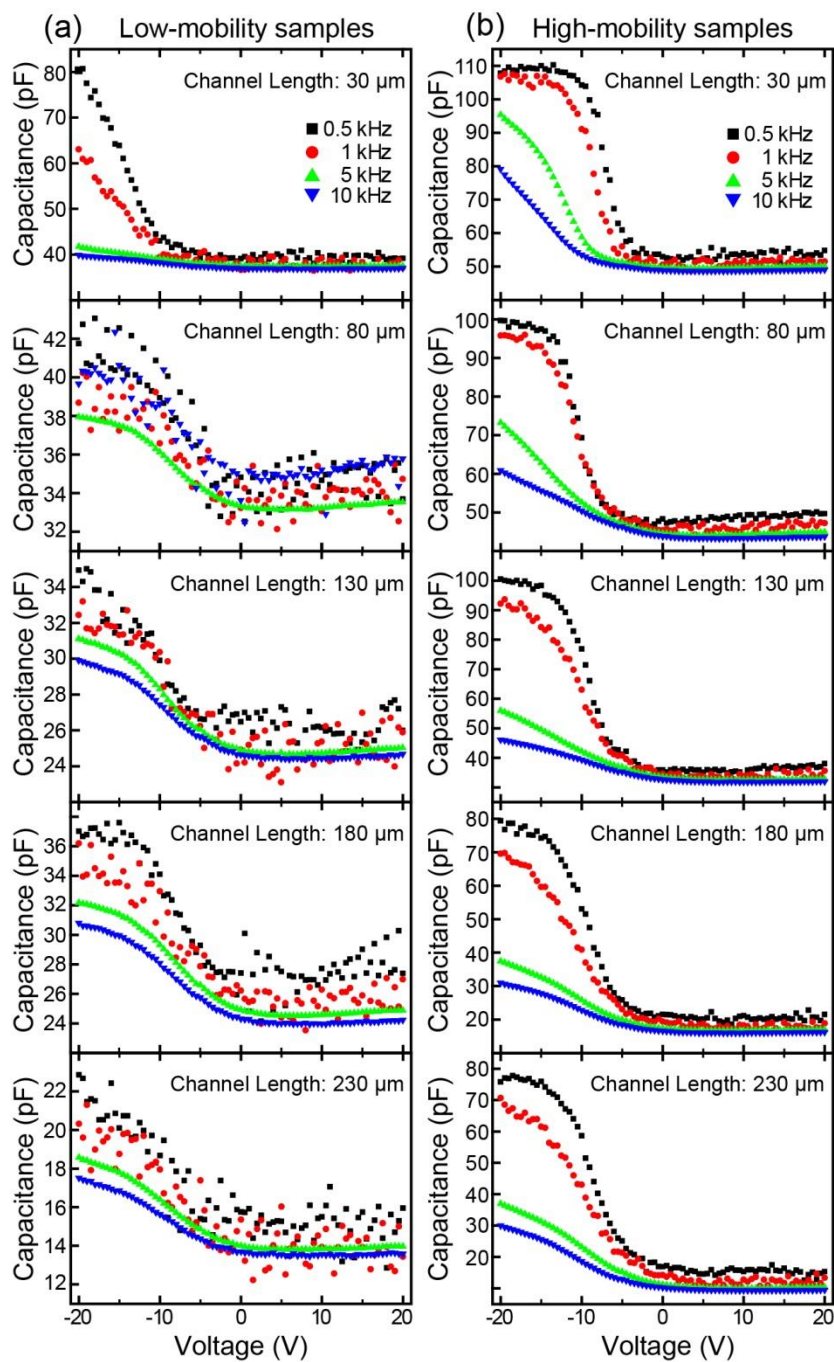

**Figure S6.** Results of  $C$ - $V$  measurements between gate and source electrodes for both (a) low and (b) high mobility of printed SWNT-TFTs with all five different channel lengths.



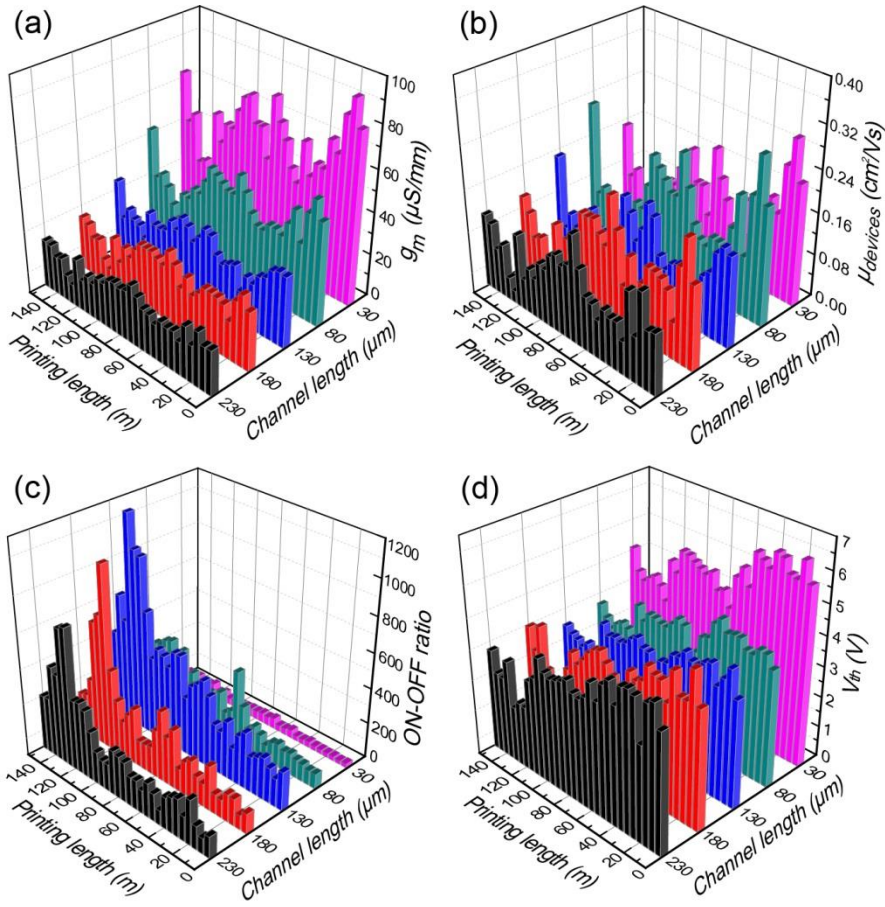

**Figure S7.** Distribution of average values of (a) transconductance ( $g_m$ ), (b) carrier mobility ( $\mu_{\text{devices}}$ ), (c) ON-OFF current ratio, and (d) threshold voltage ( $V_{\text{th}}$ ) of SWNT-TFTs with five different channel lengths at every 5 m along 150 m of PET web under 2<sup>nd</sup> printing to observe reliability of R2R gravure system.

**Table S1.** Relationship between the degree of misalignment of drain-source electrodes and attained transconductance values from printed SWNT-TFTs.

| Channel length ( $\mu\text{m}$ ) | Transconductance ( $\mu\text{S}/\text{mm}$ ) | Superposition area ( $\text{mm}^2$ ) |                | $ A - B $ ( $\text{mm}^2$ ) |
|----------------------------------|----------------------------------------------|--------------------------------------|----------------|-----------------------------|
|                                  |                                              | A source & gate                      | B drain & gate |                             |
| 230                              | 25.54                                        | 0.219                                | 0.212          | 0.007                       |
|                                  | 44.29                                        | 0.248                                | 0.208          | 0.040                       |
|                                  | 37.16                                        | 0.230                                | 0.174          | 0.056                       |
|                                  | 14.66                                        | 0.301                                | 0.084          | 0.217                       |
|                                  | 8.54                                         | 0.213                                | 0.175          | 0.036                       |
|                                  | 13.20                                        | 0.230                                | 0.163          | 0.067                       |
| 180                              | 55.39                                        | 0.268                                | 0.296          | 0.028                       |
|                                  | 40.32                                        | 0.311                                | 0.267          | 0.044                       |
|                                  | 38.01                                        | 0.319                                | 0.253          | 0.066                       |
|                                  | 18.51                                        | 0.340                                | 0.253          | 0.087                       |
|                                  | 12.05                                        | 0.359                                | 0.213          | 0.128                       |
|                                  | 14.69                                        | 0.414                                | 0.178          | 0.236                       |
| 130                              | 53.57                                        | 0.418                                | 0.423          | 0.005                       |
|                                  | 62.05                                        | 0.396                                | 0.419          | 0.023                       |
|                                  | 52.12                                        | 0.426                                | 0.374          | 0.052                       |
|                                  | 13.04                                        | 0.393                                | 0.361          | 0.035                       |
|                                  | 35.48                                        | 0.417                                | 0.394          | 0.023                       |
|                                  | 12.16                                        | 0.482                                | 0.304          | 0.178                       |
